# Supplementary material for: miR-29a-deficiency does not modify the course of murine pancreatic acinar carcinoma
Source: PubMed Central journal article supplement (PMC5432306; doi:10.18632/oncotarget.15850), 2017-03-02
Supplement: oncotarget-08-26911-s001.pdf [file oncotarget-08-26911-s001.pdf]

## miR-29a-deficiency does not modify the course of murine pancreatic acinar carcinoma

### Supplementary Materials

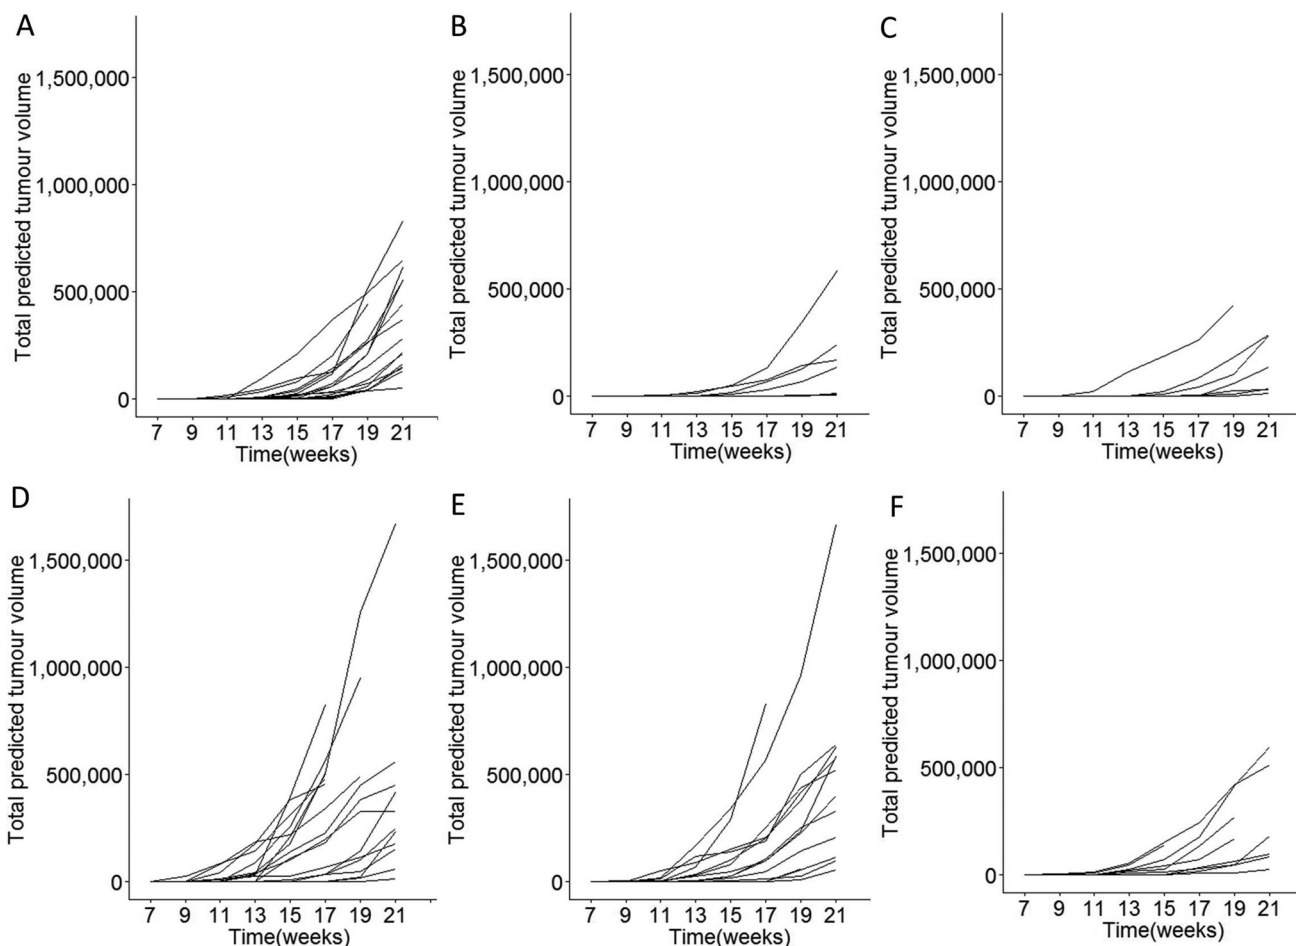

**Supplementary Figure 1: Longitudinal monitoring of tumour growth in miR-29a-deficient mice.** *Ela1-TAg*<sup>+</sup> mice, on the wildtype, *miR-29a* heterozygous and *miR-29a* knockout backgrounds, were monitored for pancreatic cancer growth by MRI every two weeks. Total tumour volume was estimated at each time-point for (A) wildtype *Ela1-TAg*<sup>+</sup> female mice, (B) *miR-29a* heterozygous *Ela1-TAg*<sup>+</sup> female mice, (C) *miR-29a* knockout *Ela1-TAg*<sup>+</sup> female mice, (D) wildtype *Ela1-TAg*<sup>+</sup> male mice, (E) *miR-29a* heterozygous *Ela1-TAg*<sup>+</sup> male mice, and (F) *miR-29a* knockout *Ela1-TAg*<sup>+</sup> male mice ( $n = 24, 11, 9, 21, 14, 10$ ). Each line indicates tumour size in a single mouse.

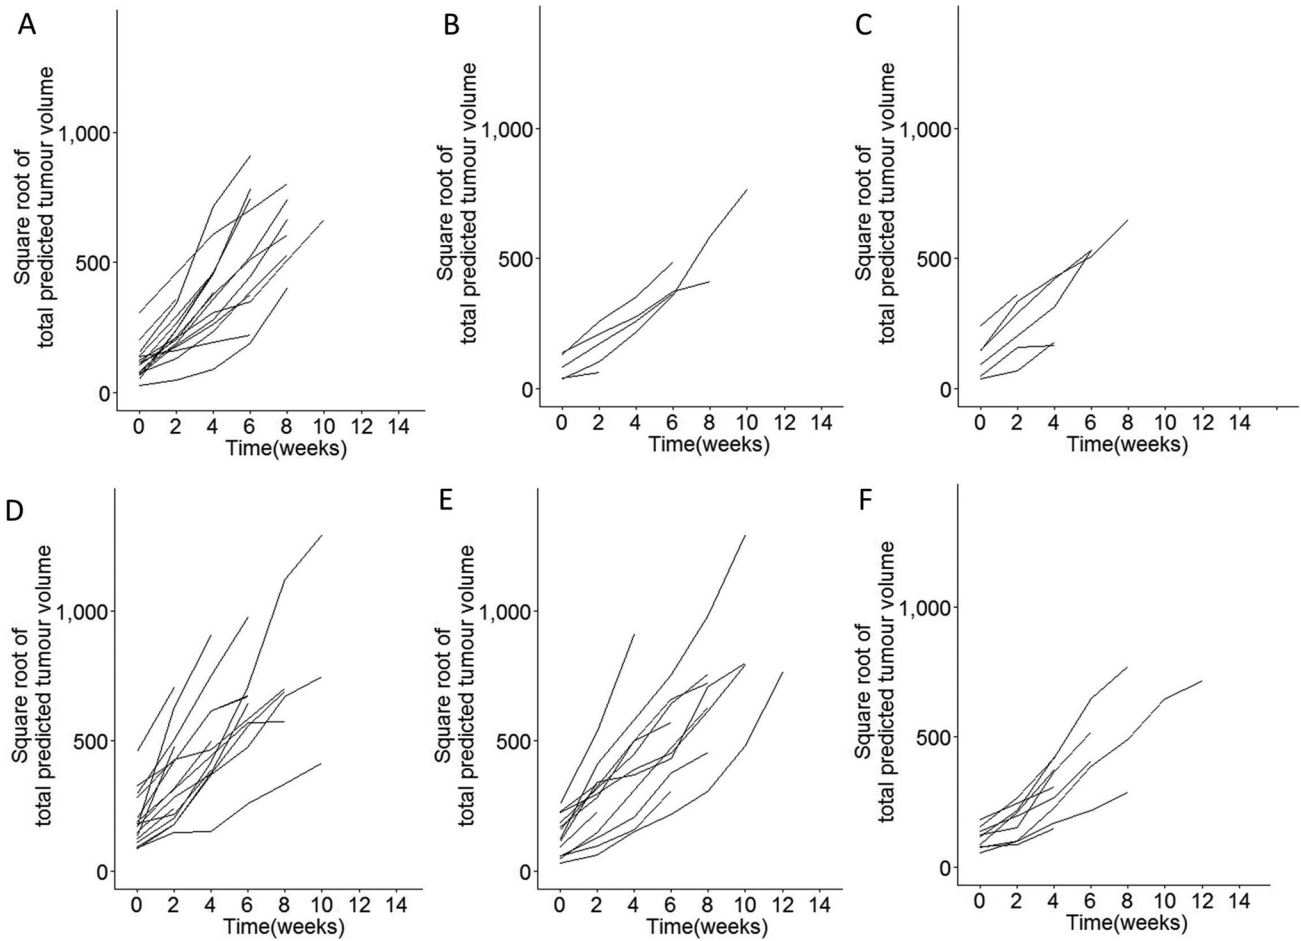

**Supplementary Figure 2: Calculation of tumour growth in a pancreatic cancer model.** Ela1-TAg<sup>+</sup> mice, on the wildtype, *miR-29a* heterozygous and *miR-29a* knockout backgrounds, were monitored for pancreatic cancer growth by MRI every two weeks. Individual square root transformed total predicted tumour volume curves for (A) wild-type female mice ( $n = 24$ ), (B) *miR-29a* heterozygous female mice ( $n = 11$ ), (C) *miR-29a*-deficient female mice ( $n = 9$ ), (D) wild-type male mice ( $n = 21$ ), (E) *miR-29a* heterozygous male mice ( $n = 14$ ) and (F) *miR-29a*-deficient male mice ( $n = 10$ ). Time 0 corresponds to the first detected tumour time-point and each line indicates tumour size in a single mouse.
